# Supplementary material for: Managing health research capacity strengthening consortia: a systematised review of the published literature
Source: PubMed Central journal article supplement (PMC6509615; doi:10.1136/bmjgh-2018-001318), 2019-04-14
Supplement: bmjgh-2018-001318supp001.pdf [file bmjgh-2018-001318supp001.pdf]

**Table S1. Search terms and variants used in identification of papers**

| <b>Goal</b>              | <b>Intervention<br/>(variants combined by 'OR')</b> | <b>Mode<br/>(variants combined by 'OR')</b> | <b>Geographic location<br/>(variants combined by 'OR')</b> |
|--------------------------|-----------------------------------------------------|---------------------------------------------|------------------------------------------------------------|
| Health research capacity | Strengthening                                       | Consorti*                                   | LMIC                                                       |
|                          | Building                                            | Collaborat*                                 | Low* income                                                |
|                          | Developing                                          | Partner*                                    | Low* and middle income                                     |
|                          | Development                                         | Network                                     | South                                                      |
|                          |                                                     |                                             | Developing countr*                                         |
|                          |                                                     |                                             | Global                                                     |
|                          |                                                     |                                             | Africa                                                     |
|                          |                                                     |                                             | Asia                                                       |
|                          |                                                     |                                             | Latin America                                              |
|                          |                                                     |                                             | Caribbean                                                  |
|                          |                                                     |                                             | South America                                              |
|                          |                                                     |                                             | Pacific                                                    |

**Table S2. Supplementary data on included empirical papers on HRCS consortium management**

| Paper Reference       | Study Design                            | Objective of paper                                                          | LMIC Geographical coverage <sup>1</sup>                                                  | Programme Components      | Programme Focus                                                     | Study conducted by    | MMAT Score <sup>2</sup> |
|-----------------------|-----------------------------------------|-----------------------------------------------------------------------------|------------------------------------------------------------------------------------------|---------------------------|---------------------------------------------------------------------|-----------------------|-------------------------|
| Ager & Zarowsky 2015  | Retrospective, summative, qualitative   | Common challenges and their key drivers of HRCS                             | South, East & West Africa                                                                | RCS                       | Multiple                                                            | External              | ***                     |
| Anderson et al 2014   | Retrospective, formative, qualitative   | Evaluating the initial effects of a charter for collaboration               | Africa - Ghana                                                                           | Education<br>RCS          | Health education and research                                       | Internal              | Not scored              |
| Birch et al 2013      | Prospective, formative, qualitative     | Self-evaluation of partnership using an identified assessment measure       | Africa - Malawi                                                                          | Clinical care<br>Research | Nursing                                                             | Internal              | **                      |
| Dean et al 2015       | Retrospective, summative mixed methods  | Lessons for establishing and maintaining successful research collaborations | West and East Africa                                                                     | RCS                       | Health, agriculture, water and sanitation, biodiversity, and energy | External              | **                      |
| Elmusharaf et al 2016 | Retrospective, summative, qualitative   | Achievements and outcomes of partnership                                    | Africa - Sudan                                                                           | RCS                       | Health systems                                                      | Internal and external | **                      |
| Farnman et al 2016    | Retrospective, summative, qualitative   | Successes, challenges and lessons learned                                   | Africa - Uganda, South Africa, Tanzania Malawi<br><br>Asia - China, India, Oman, Vietnam | RCS                       | Health systems and services & Social determinants of health         | Internal              | ***                     |
| Jentsch & Pilley 2003 | Retrospective, summative, qualitative   | Processes and dynamics within collaborations                                | Asia - Bangladesh & Thailand                                                             | Research<br>RCS           | Multiple                                                            | Internal              | **                      |
| Larkan et al 2016     | Retrospective, qualitative              | Characteristics of successful research partnerships                         | Africa & Asia                                                                            | Research<br>RCS           | Multiple                                                            | Internal              | ***                     |
| Mafigiri et al 2014   | Prospective, formative, qualitative     | Experiences, successes and challenges of collaboration                      | Africa - Uganda                                                                          | Education<br>RCS          | Health education and research                                       | External              | **                      |
| Marjanovic et al 2013 | Retrospective, formative, mixed methods | Experiences of consortia actors                                             | Africa - East, West and South Africa                                                     | RCS                       | Multiple                                                            | External              | Not scored              |
| Mayhew et al 2008     | Retrospective, summative, mixed methods | Successes and challenges, and lessons learned                               | Africa - South Africa<br>Asia - Thailand                                                 | RCS<br>Research           | Health Economics                                                    | External              | *                       |
| Murphy et al 2015     | Retrospective, qualitative              | Research partnership experiences of stakeholders                            | Asia, Latin America and Africa                                                           | Research<br>RCS           | Multiple                                                            | Internal              | **                      |

|                            |                                         |                                                                                                                                             |                                                                                         |                                    |                                            |            |      |
|----------------------------|-----------------------------------------|---------------------------------------------------------------------------------------------------------------------------------------------|-----------------------------------------------------------------------------------------|------------------------------------|--------------------------------------------|------------|------|
| Neuhann & Barteit 2017     | Retrospective, summative, mixed methods | Outputs and outcomes including project's eventual failure, and lessons learnt                                                               | Africa - Malawi                                                                         | Care Research<br>RCS               | Clinical care, health education & research | Internal   | *    |
| Redman-MacLaren et al 2012 | Retrospective, summative, qualitative   | Mutuality of research capacity strengthening                                                                                                | Pacific - Solomon Islands,                                                              | RCS                                | Nursing                                    | Internal   | **** |
| Van der Veken et al 2017   | Retrospective, formative, qualitative   | Obstacles for southern institutions RCS & perceptions of southern researchers on capacity transfer                                          | Africa - Burkina Faso, Benin, Senegal, Cote d'Ivoire, Guinea, Morocco, Tunisia, Algeria | RCS Research                       | Sexual and reproductive health             | Internal   | **** |
| Varshney et al 2016        | Retrospective, formative, qualitative   | Understand challenges of collaborations, whether collaboration result in capacity building, and requirements for sustainable collaborations | Africa - South Africa<br>Asia - China, India, Oman, Vietnam                             | RCS                                | Social determinants of health              | Not stated | ***  |
| Yarmoshuk et al 2018       | Retrospective, summative, mixed methods | Describe partnerships characterized as higher-value for building the capacity of four universities and identify why they are so considered  | Africa - Kenya, Tanzania                                                                | Education Research Practice<br>RCS | Multiple                                   | External   | **   |
| Yassi et al 2016           | Retrospective, summative, qualitative   | Determine the partnership model used, success factors and lessons learnt                                                                    | Africa - South Africa                                                                   | Practice Research<br>RCS           | Occupational health and infection control  | Internal   | **** |

(H)RCS – (Health) research capacity strengthening

<sup>1</sup>Specific countries or regions are listed if named in the publication

<sup>2</sup>MMAT scoring metrics: \* = one criteria met (25%) to \*\*\*\* = all criteria met (100%); Not scored= did not fulfil screening criteria, thus not eligible for full appraisal

**Table S3. Supplementary data on included commentary papers on HRCS consortium management**

| Paper Reference            | Commentary informed by | Objective of paper                                                                                                        | LMIC Geographical coverage <sup>1</sup>                                                                               | Programme Components                          | Programme Focus                                             |
|----------------------------|------------------------|---------------------------------------------------------------------------------------------------------------------------|-----------------------------------------------------------------------------------------------------------------------|-----------------------------------------------|-------------------------------------------------------------|
| Airhihenbuwa et al 2011    | Personal experience    | Present partnership that led to training, and make recommendations for capacity building for health researchers in Africa | Africa - South Africa                                                                                                 | RCS                                           | HIV/AIDS                                                    |
| Ali et al 2012             | Personal experience    | Report on implementation, outputs and challenges of partnership                                                           | Asia - India                                                                                                          | Research<br>RCS                               | Cancer                                                      |
| Asirwa et al 2016          | Personal experience    | Describe programme content, outcome measures and challenges                                                               | Africa - Kenya                                                                                                        | Clinical care<br>Education<br>Research<br>RCS | Multiple health research areas                              |
| Atkins et al 2016          | Personal experience    | Describe the activities of two consortia                                                                                  | Africa - Uganda, South Africa, Tanzania Malawi                                                                        | RCS                                           | Health systems and services & Social determinants of health |
| Breuer et al 2018          | Personal experience    | Reflect on the history, formation, challenges and achievements of the partnership                                         | Asia - China, India, Oman, Vietnam)<br>Africa - Ethiopia, South Africa, Uganda                                        | RCS<br>Research                               | Mental health                                               |
| Cash-Gibson et al 2015     | Personal experience    | Description of a collaborative RCS project                                                                                | Asia - India, Nepal<br>Africa - Kenya, South Africa, Tanzania<br>Latin America & Caribbean - Brazil, Mexico, Colombia | RCS                                           | Social determinants of health                               |
| Chandiwana & Ornbjerg 2003 | Review                 | Discuss lessons in North-South and South-South cooperation                                                                | Zimbabwe, Southern Africa                                                                                             | RCS                                           | Public health research                                      |
| Dalmar et al 2017          | Personal experience    | Outline reasons and motivations for re-launching research cooperation programme                                           | Africa - Somalia                                                                                                      | RCS                                           | Health research                                             |

|                            |                     |                                                                                                            |                                                                         |                                               |                              |
|----------------------------|---------------------|------------------------------------------------------------------------------------------------------------|-------------------------------------------------------------------------|-----------------------------------------------|------------------------------|
| de-Graft Aikins et al 2012 | Personal experience | Review the partnership's achievements and challenges                                                       | Africa - Ghana, Burkina Faso, Nigeria, Kenya, Cameroun, South Africa    | Research<br>RCS                               | Chronic diseases             |
| Eckerle et al 2017         | Personal experience | Describe evolution of novel global health partnership                                                      | Asia - Malaysia<br>Africa - Malawi                                      | Clinical care<br>Education<br>Research<br>RCS | Paediatric emergencies       |
| Ezeh et al 2010            | Personal experience | Describe the consortium                                                                                    | Africa - Kenya, South Africa, Tanzania, Uganda, Nigeria, Malawi, Rwanda | RCS                                           | Population and public health |
| Fischer et al 2017         | Personal experience | Describe steps taken and key factors in establishing a successful collaborative consortium, and challenges | Africa - Nigeria                                                        | Research<br>Clinical care<br>RCS              | Cancers                      |
| Greenwood et al 2012       | Personal experience | Key lessons learnt                                                                                         | Africa - Malawi, Tanzania, Gambia, Ghana                                | RCS<br>Research                               | Malaria                      |
| Greenwood et al 2018       | Personal experience | Describe programme activities and lessons learnt                                                           | Africa - Senegal, Malawi, Tanzania, Uganda, Ghana                       | RCS                                           | Malaria                      |
| Gureje et al 2018          | Personal experience | Describe the partnership, programme components, and challenges                                             | Africa - Nigeria, South Africa, Ghana, Kenya and Liberia                | Research<br>RCS                               | Mental health                |
| Kaddumukasa et al 2014     | Personal experience | Describe partnership initiative                                                                            | Africa - Uganda                                                         | RCS<br>Education                              | Neurology                    |
| Kutcher et al 2010         | Personal experience | Describe the process and activities of a partnership                                                       | Cuba, Latin America & Caribbean                                         | Research<br>RCS                               | Mental health                |
| MacLaren et al 2015        | Personal experience | Provide an example of a RCS model                                                                          | Pacific - Solomon Islands                                               | RCS                                           | Nursing                      |
| Mathai et al 2018          | Personal experience | Describe a South-North collaboration                                                                       | Africa - Kenya                                                          | RCS<br>Research                               | Mental health                |
| Miiro et al 2013           | Personal experience | Outline the initial experiences of the merits, outputs and lessons learnt in 4 networks                    | West, East, Central and Southern Africa                                 | Research<br>RCS                               | HIV/, TB, Malaria and NTDs   |

|                                     |                     |                                                                                                                                      |                                                                                |                                           |                               |
|-------------------------------------|---------------------|--------------------------------------------------------------------------------------------------------------------------------------|--------------------------------------------------------------------------------|-------------------------------------------|-------------------------------|
| Miranda et al 2018                  | Personal experience | Explore features of existing partnerships                                                                                            | Latin America & Caribbean                                                      | Research<br>RCS                           | Non-communicable diseases     |
| Nakabugo et al 2010                 | Personal experience | Illustrate potential mutual benefits from partnerships, challenges and strategies for achieving a mutual and sustainable partnership | Africa - Malawi, Mozambique, Tanzania, Uganda                                  | RCS                                       | Health and education          |
| Noormahomed et al 2017              | Personal experience | To describe programme outcomes, compare main features with traditional collaboration models; and describe sustainability strategies  | Africa - Mozambique                                                            | Education<br>RCS                          | Health education and research |
| O'Connor et al 2016                 | Personal experience | Present results and lessons learnt                                                                                                   | Africa - Malawi                                                                | Education<br>Research<br>RCS              | Nursing informatics           |
| Ogden & Porter 2000                 | Personal experience | Recount the unfolding of two related international research collaborations                                                           | Asia - India                                                                   | Research<br>RCS                           | Tuberculosis                  |
| Onokerhoraye & Maticka-Tyndale 2012 | Personal experience | Examine the experience of the partnership and outlining successes and challenges                                                     | Africa - Nigeria                                                               | Research<br>RCS,<br>Knowledge translation | HIV/AIDS                      |
| O'Sullivan et al 2017               | Personal experience | Describe the approach used to develop a collaborative and sustainable partnership, and initial project outcomes                      | Africa - Uganda                                                                | Education<br>RCS                          | Physiotherapy                 |
| Pinto et al 2012                    | Personal experience | Using the International Participatory Research Framework (IPRF) to build a partnership                                               | Latin America & Caribbean - Brazil                                             | Research<br>RCS                           | HIV/AIDS                      |
| Reddy et al 2002                    | Personal experience | Discussion of challenges and opportunities for capacity building and collaboration strategies                                        | Africa - South Africa                                                          | RCS                                       | HIV/AIDS                      |
| Sanchez et al 2013                  | Personal experience | Describe the implementation, challenges, and lessons learned of an RCS project                                                       | Latin America & Caribbean - Honduras                                           | RCS                                       | Infectious diseases           |
| Semrau et al 2018                   | Personal experience | Discuss programme approaches and outputs                                                                                             | Africa - Ethiopia, Nigeria, South Africa and Uganda<br><br>Asia - India, Nepal | Clinical care<br>RCS                      | Mental health                 |

|                           |                     |                                                                                                                      |                                                          |                                               |                                |
|---------------------------|---------------------|----------------------------------------------------------------------------------------------------------------------|----------------------------------------------------------|-----------------------------------------------|--------------------------------|
| Silva et al 1994          | Personal experience | Review the results of the programme from the angle of cross-fertilization of disciplines through their collaboration | Asia – Sri Lanka                                         | RCS Research                                  | Health social science          |
| Spiegel et al 2006        | Personal experience | Summarize how collaboration was pursued, identify outputs, and highlight mutual benefits gained                      | Latin America & Caribbean - Cuba                         | Education Research<br>RCS                     | Environmental Health           |
| Stillman et al 2006       | Personal experience | Describe the approach, main outcomes and challenges of a partnership                                                 | Asia - China, Latin America & Caribbean - Brazil, Mexico | RCS Research                                  | Tobacco control                |
| Tierney et al 2013        | Personal experience | Describe partnership, challenges and value created                                                                   | Africa - Kenya                                           | Clinical care<br>Education<br>Research<br>RCS | Multiple health research areas |
| Van Teijlingen et al 2018 | Personal experience | Highlight reasons for, considerations, and procedures around development of partnerships and key challenges          | Asia = Nepal                                             | Education<br>RCS<br>Research                  | Not stated                     |
| Vasques et al 2013        | Personal experience | Highlight major challenges to the HRCS enterprise and make recommendations                                           | Asia - Vietnam                                           | RCS                                           | HIV/AIDS                       |

(H)RCS - (Health) research capacity strengthening

<sup>1</sup>Specific countries or regions are listed if named in the publication
